# Supplementary material
Source: PubMed Central journal article supplement (PMC3826531)
Supplement: NIHMS55371-supplement-SuppTables.pdf [file NIHMS55371-supplement-SuppTables.pdf]

**Table S1. qPCR Analysis of Eph Receptors and Ephrin Ligands Expression in Pure Populations of Schwann Cells and Fibroblasts, Related to Figure S3**

|           | Schwann Cells | Fibroblasts |
|-----------|---------------|-------------|
| EphB1     | -             | -           |
| EphB2     | +             | +           |
| EphB3     | +             | +           |
| EphB4     | +             | +           |
| EphB6     | +             | -           |
| EphA4     | +             | +           |
| Ephrin-B1 | +             | +           |
| Ephrin-B2 | -             | +           |
| Ephrin-B3 | -             | -           |
| Ephrin-A5 | -             | -           |

**Table S2. Primers used for QPCR, Related to the Extended Experimental Procedures**

| <b>Gene Name</b> | <b>Forward Primer (5'-3')</b> | <b>Reverse Primer (5'-3')</b> |
|------------------|-------------------------------|-------------------------------|
| EphA4            | CACCATCATCCATTGCTTTG          | AAAGGGTTCAGGCCTTTGAT          |
| EphB1            | TTCAGCATTACAGCACAGGC          | CAATCGGCCCTTGTACACTT          |
| EphB2            | CAACTGGCTACGGACCAAAT          | TCTCCATCCAGTTGGGAAAG          |
| EphB3            | TCGCACAGTAGCAGGTTACG          | GCAGACAAGAGCAATGACCA          |
| EphB4            | CATCAAGGTGGACACAGTGG          | AAAGAGATGCAAGGAGAGCA          |
| EphB6            | TCCTTCACCATGACCAGTGA          | AACCAATCACCAAGGACAGC          |
| Ephrin-A5        | GCTGCTCTTTCTGGTGCTCT          | GTGGTAGTCACCCCTCTTGGA         |
| ephrin-B1        | GGAAATCCGCTTTACCATCA          | CGTTACGGCATTGATCTT            |
| ephrin-B2        | TCCCTTTGTGAAGCCAAATC          | GTCTCCTGCGGTACTIONGAGC        |
| Ephrin-B3        | CTGGTGTCTGGACTCAGCCT          | AACTTAGGAGAGGAGTGGGGG         |
| Cdh-2            | CAGAGAGTCGCCAAATGTCA          | TTCACAAGTCTCGGCCTCTT          |

**Table S3. Target Regions for siRNA Duplex Formation, Related to the Extended Experimental Procedures**

| <b>Gene Name</b> | <b>Target Sequence 1 (rat-specific)</b> | <b>Target Sequence 2</b> | <b>Working Concentration (nM)</b> |
|------------------|-----------------------------------------|--------------------------|-----------------------------------|
| Cdh-2            | TCCCAACATGTTTACAATCAA                   | CAGTATACGTTAATAATTCAA    | 1.5-5nM                           |
| Sox2             | AACGTTCTAGATTGTAATAAA                   | AACAGTTACGTTTCCAATAA     | 1.5-5nM                           |
| EphB2            | ACCCGACTACACCAGCTTTAA                   | CTGGGTGGCCGCGTCATGAAA    | 1.5-5nM                           |
